# Supplementary material
Source: PubMed Central journal article supplement (PMC10020463)
Supplement: 41541_2023_633_MOESM1_ESM.pdf [file 41541_2023_633_MOESM1_ESM.pdf]

|                 |  | S1 subunit (14-685) |    |    |    |    |    |    |    |    |    |    |    |    |    |     |     |     |     |     |     | S2            |     |     |     |     |     |      |     |         |         |     |     |     |     |     |     |     |   |   |   |   |   |   |   |
|-----------------|--|---------------------|----|----|----|----|----|----|----|----|----|----|----|----|----|-----|-----|-----|-----|-----|-----|---------------|-----|-----|-----|-----|-----|------|-----|---------|---------|-----|-----|-----|-----|-----|-----|-----|---|---|---|---|---|---|---|
|                 |  | NTD (14-305)        |    |    |    |    |    |    |    |    |    |    |    |    |    |     |     |     |     | RBD |     | CTD (542-685) |     |     |     |     |     |      |     |         |         |     |     |     |     |     |     |     |   |   |   |   |   |   |   |
| AA #            |  | 18                  | 19 | 20 | 24 | 25 | 26 | 27 | 67 | 69 | 70 | 75 | 76 | 80 | 95 | 138 | 142 | 143 | 144 | 145 | 156 | 157           | 158 | 190 | 211 | 212 | 213 | i214 | 215 | 242-244 | 246-252 | 253 | 547 | 570 | 614 | 655 | 679 | 681 |   |   |   |   |   |   |   |
| Wuhan-Hu-1      |  | L                   | T  | T  | L  | D  | P  | A  | A  | H  | V  | G  | T  | D  | T  | D   | G   | V   | Y   | V   | E   | F             | R   | R   | N   | L   | V   |      |     | D       |         |     |     |     | T   | A   | D   | H   | N | P |   |   |   |   |   |
| B.1/ B.1.22     |  | .                   | .  | .  | .  | .  | .  | .  | .  | .  | .  | .  | .  | .  | .  | .   | .   | .   | .   | .   | .   | .             | .   | .   | .   | .   | .   | .    | .   | .       | .       | .   | .   | .   | .   | .   | .   | .   | . | . | . | . |   |   |   |
| B.1.1.7         |  | .                   | .  | .  | .  | .  | .  | .  | .  | .  | .  | .  | .  | .  | .  | .   | .   | .   | .   | .   | .   | .             | .   | .   | .   | .   | .   | .    | .   | .       | .       | .   | .   | .   | .   | .   | .   | .   | . | . | . | . |   |   |   |
| B.1.351         |  | .                   | .  | .  | .  | .  | .  | .  | .  | .  | .  | .  | .  | .  | .  | .   | .   | .   | .   | .   | .   | .             | .   | .   | .   | .   | .   | .    | .   | .       | .       | .   | .   | .   | .   | .   | .   | .   | . | . | . | . |   |   |   |
| P.1             |  | F                   | .  | N  | .  | S  | .  | .  | .  | .  | .  | .  | .  | .  | .  | .   | Y   | .   | .   | .   | .   | .             | .   | .   | .   | .   | .   | .    | .   | .       | .       | .   | .   | .   | .   | .   | .   | .   | . | . | . |   |   |   |   |
| B.1.617.2/ AY.5 |  | R                   | .  | .  | .  | .  | .  | .  | .  | .  | .  | .  | .  | .  | .  | .   | D   | .   | .   | .   | G   | .             | .   | .   | .   | .   | .   | .    | .   | .       | .       | .   | .   | .   | .   | .   | .   | .   | . | . | . |   |   |   |   |
| C.37            |  | .                   | .  | .  | .  | .  | .  | .  | .  | .  | .  | V  | I  | .  | .  | .   | .   | .   | .   | .   | .   | .             | .   | .   | .   | .   | .   | .    | .   | .       | .       | .   | .   | .   | .   | .   | .   | .   | . | . | . |   |   |   |   |
| BA.1            |  | .                   | .  | .  | .  | .  | .  | V  | .  | .  | .  | .  | .  | .  | .  | I   | D   | .   | .   | .   | .   | .             | .   | .   | .   | .   | .   | .    | EPE | .       | .       | .   | .   | .   | .   | .   | .   | .   | K | G | Y | K | H |   |   |
| BA.2            |  | .                   | I  | .  | .  | .  | .  | S  | .  | .  | .  | .  | .  | .  | .  | .   | D   | .   | .   | .   | .   | .             | .   | .   | .   | .   | G   | .    | .   | .       | .       | .   | .   | .   | .   | .   | .   | .   | . | . | . | G | Y | K | H |

|                 |  | RBD (319-541) |     |     |     |     |     |     |     |     |     |     |     | S2 subunit (686-1273) |     |     |     |     |     |     |     |     |     |     |     |     |     |     |     |     |     |     |      |      |      |   |   |   |   |   |   |
|-----------------|--|---------------|-----|-----|-----|-----|-----|-----|-----|-----|-----|-----|-----|-----------------------|-----|-----|-----|-----|-----|-----|-----|-----|-----|-----|-----|-----|-----|-----|-----|-----|-----|-----|------|------|------|---|---|---|---|---|---|
| AA #            |  | 339           | 371 | 373 | 375 | 376 | 405 | 408 | 417 | 440 | 446 | 452 | 477 | 478                   | 484 | 490 | 493 | 496 | 498 | 501 | 505 | 701 | 716 | 764 | 796 | 856 | 859 | 950 | 954 | 969 | 981 | 982 | 1027 | 1118 | 1176 |   |   |   |   |   |   |
| Wuhan-Hu-1      |  | G             | S   | S   | S   | T   | D   | R   | K   | N   | G   | L   | S   | T                     | E   | F   | Q   | G   | Q   | N   | Y   | A   | T   | N   | D   | N   | T   | D   | Q   | N   | L   | S   | T    | D    | V    |   |   |   |   |   |   |
| B.1/ B.1.22     |  | .             | .   | .   | .   | .   | .   | .   | .   | .   | .   | .   | .   | .                     | .   | .   | .   | .   | .   | .   | .   | .   | .   | .   | .   | .   | .   | .   | .   | .   | .   | .   | .    | .    | .    | . | . | . | . | . | . |
| B.1.1.7         |  | .             | .   | .   | .   | .   | .   | .   | .   | .   | .   | .   | .   | .                     | .   | .   | .   | .   | .   | .   | Y   | .   | .   | .   | .   | .   | .   | .   | .   | .   | .   | .   | .    | .    | .    | . | . | . | . | . |   |
| B.1.351         |  | .             | .   | .   | .   | .   | .   | .   | N   | .   | .   | .   | .   | .                     | .   | K   | .   | .   | .   | Y   | .   | .   | .   | .   | .   | .   | .   | .   | .   | .   | .   | .   | .    | .    | .    | . | . | . | . | . |   |
| P.1             |  | .             | .   | .   | .   | .   | .   | .   | T   | .   | .   | .   | .   | .                     | .   | K   | .   | .   | .   | Y   | .   | .   | .   | .   | .   | .   | .   | .   | .   | .   | .   | .   | .    | .    | .    | . | . | . | . | . |   |
| B.1.617.2/ AY.5 |  | .             | .   | .   | .   | .   | .   | .   | .   | .   | .   | R   | K   | .                     | .   | .   | .   | .   | .   | .   | .   | .   | .   | .   | .   | .   | .   | .   | .   | .   | .   | .   | .    | .    | .    | . | . | . | . | . |   |
| C.37            |  | .             | .   | .   | .   | .   | .   | .   | .   | .   | .   | Q   | .   | .                     | .   | S   | .   | .   | .   | .   | .   | .   | .   | .   | .   | .   | .   | .   | .   | .   | .   | .   | .    | .    | .    | . | . | . | . | . |   |
| BA.1            |  | D             | L   | P   | F   | .   | .   | .   | N   | K   | S   | .   | N   | K                     | A   | .   | R   | S   | R   | Y   | H   | .   | .   | .   | .   | .   | .   | .   | .   | .   | .   | .   | .    | .    | .    | . | . | . | . | . |   |
| BA.2            |  | D             | F   | P   | F   | A   | N   | S   | N   | K   | .   | .   | N   | K                     | A   | .   | R   | .   | R   | Y   | H   | .   | .   | .   | .   | .   | .   | .   | .   | .   | .   | .   | .    | .    | .    | . | . | . | . | . |   |

**Supplemental table 1. Spike mutations in SARS-CoV-2 challenge stocks compared with Wuhan-Hu-1.** The mutations/ deletions in spike are shown compared with the Wuhan-Hu-1 isolate (MN908947; lineage B). N-terminal domain (NTD), receptor-binding domain (RBD), C-terminal domain (CTD), dots indicate no differences to the Wuhan-Hu-1 sequence and deletions are indicated with a dash. B.1.1.7 (Alpha), B.1.351 (Beta), P.1 (Gamma), B.1.617.2/ AY.5 (Delta), C.37 (Lambda), BA.1/ BA.2 (Omicron).

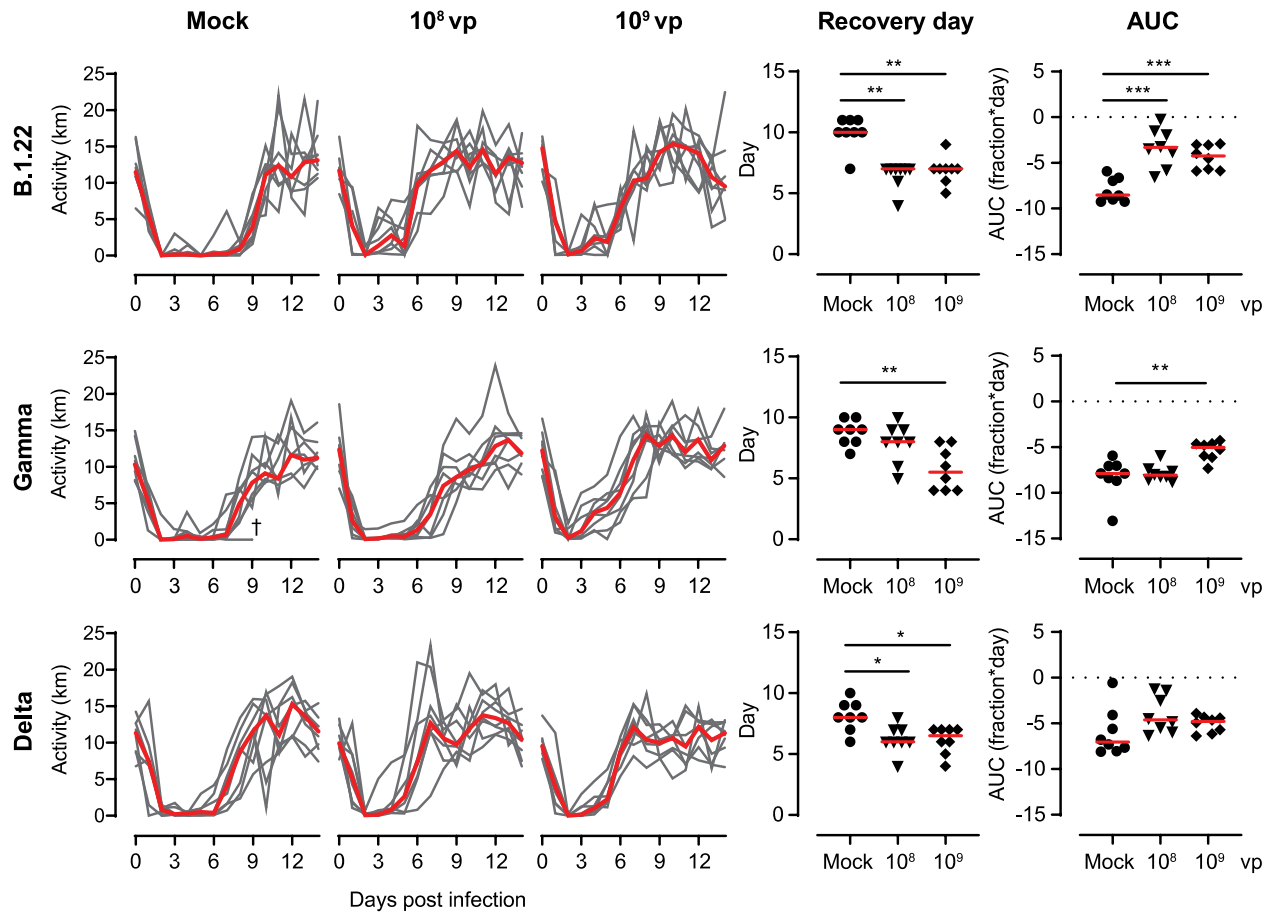

**Supplemental figure 1. Ad26.COV2.S protects against activity loss upon SARS-CoV-2 B.1.22, Gamma and Delta challenge.** Hamsters were vaccinated with formulation buffer (mock), 10<sup>8</sup> or 10<sup>9</sup> vp Ad26.COV2.S at day -28 (n=8 per group). The animals were intranasally challenged with 10<sup>3</sup> TCID<sub>50</sub> SARS-CoV-2 B.1.22, 10<sup>4</sup> TCID<sub>50</sub> SARS-CoV-2 Gamma or 10<sup>4</sup> TCID<sub>50</sub> SARS-CoV-2 Delta on day 0 and followed up till day 14. Individual activity traces, the day at which animals recovered from activity loss (defined by regaining at least 2.5 km activity a day for 2 consecutive days) and the area under the curve (AUC) as a fraction\*day compared with the pre-challenge activity are shown. Red lines indicate group medians. † indicates a humane endpoint was reached. Comparisons to the mock group were performed by ANOVA with a post-hoc t-test or a Mann-Whitney U-test with a 2-fold Bonferroni correction. Statistical differences are indicated by asterisks: \* P<0.05, \*\* P<0.01, \*\*\* P<0.001.

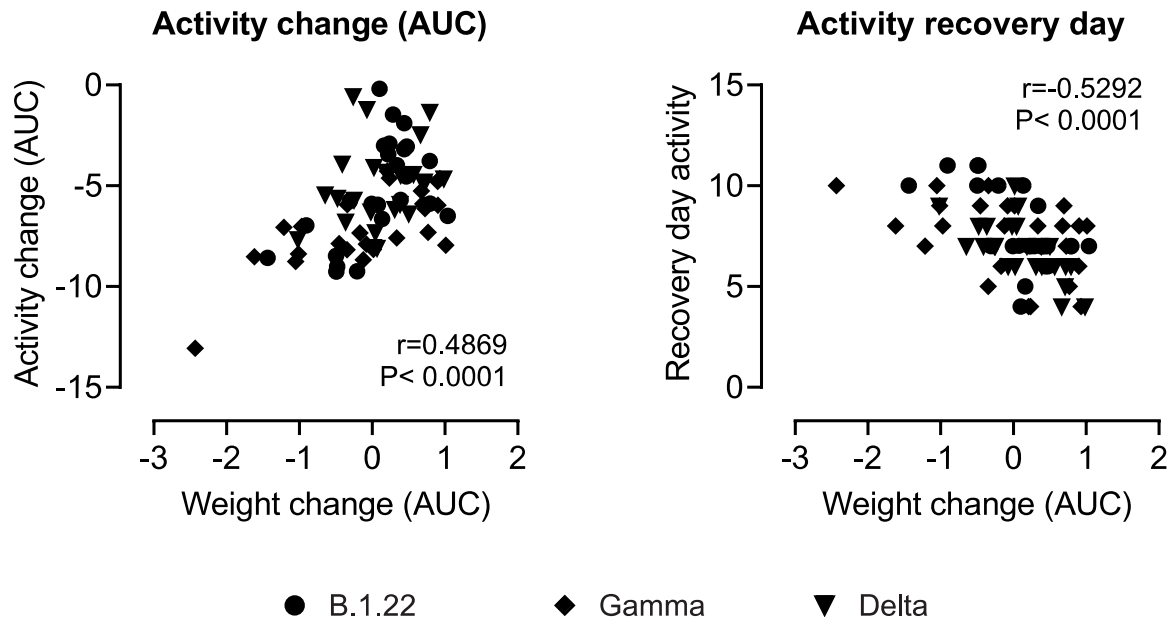

**Supplemental figure 2. Correlation activity change with weight change post SARS-CoV-2 challenge.**

Hamsters were vaccinated with formulation buffer (mock),  $10^8$  or  $10^9$  vp Ad26.COVS at day -28. Hamsters were intranasally challenged with  $10^3$  TCID<sub>50</sub> SARS-CoV-2 B.1.22,  $10^4$  TCID<sub>50</sub> SARS-CoV-2 Gamma or  $10^4$  TCID<sub>50</sub> SARS-CoV-2 Delta on day 0. The correlation between the area under the curve (AUC as fraction\*day compared with pre-challenge weight/ activity) for weight change with the AUC for weight change or the recovery day post-activity change is shown. The day at which animals recovered from activity loss was defined as regaining at least 2.5 km activity a day for 2 consecutive days. Correlation coefficients were calculated across all 3 VOC using two-sided Spearman rank correlation.

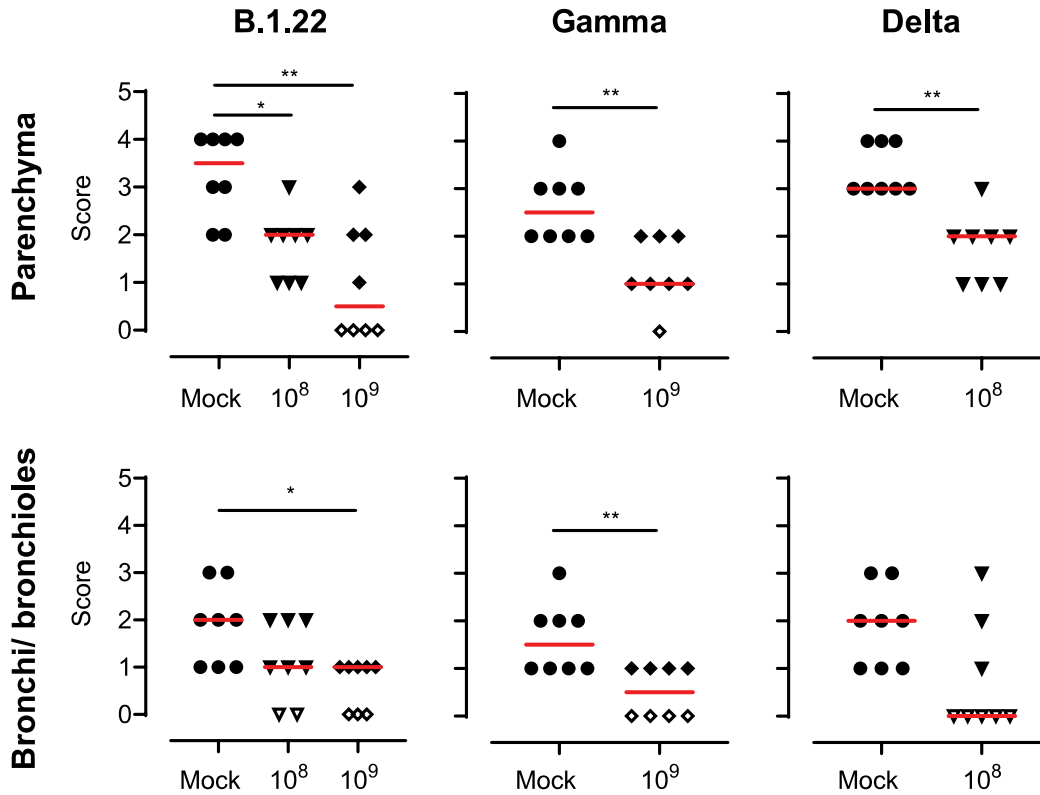

**Supplemental figure 3. Nucleocapsid positivity in hamsters after SARS-CoV-2 B.1.22, Gamma and Delta challenge.** Hamsters were vaccinated with formulation buffer (mock), 10<sup>8</sup> or 10<sup>9</sup> vp Ad26.COV2.S at day -28 (n=8 per group). The animals were intranasally challenged with 10<sup>3</sup> TCID<sub>50</sub> SARS-CoV-2 B.1.22, 10<sup>4</sup> TCID<sub>50</sub> SARS-CoV-2 Gamma or 10<sup>4</sup> TCID<sub>50</sub> SARS-CoV-2 Delta on day 0. While animals vaccinated with 10<sup>8</sup> and 10<sup>9</sup> vp were evaluated at day 4 after challenge with SARS-CoV-2 B.1.22, only animals vaccinated with 10<sup>9</sup> vp were examined at day 4 after challenge with SARS-CoV-2 Gamma and only 10<sup>8</sup> vp-vaccinated animals were evaluated at day 4 after challenge with the Delta variant. Lungs were stained and scored for SARS-CoV-2 nucleocapsid-protein positivity (score 0-5) in lung parenchyma and in bronchi/bronchioles. Red horizontal bars indicate the median response per group. Open symbols indicate a score of 0. Comparisons were performed by a Mann-Whitney U-test with a 2-fold Bonferroni correction. Statistical differences are indicated by asterisks: \* P<0.05; \*\* P<0.01.

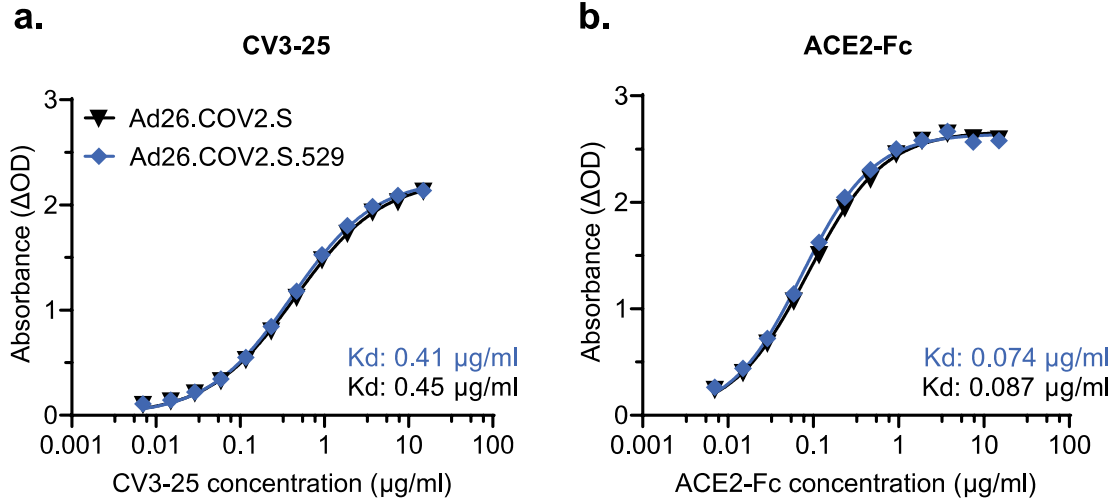

**Supplemental figure 4. Comparison of CV3-25 and ACE2-Fc antibody binding to spike after expression by Ad26.COVS.S and Ad26.COVS.S.529.** CV3-25 is an antibody that binds to the stem region of the SARS-CoV-2 spike S2<sup>1</sup>, which is conserved between the Wuhan-Hu-1 and BA.1 spike protein and ACE2-binding affinity is reported to be similar between Wuhan-Hu-1 Spike and Omicron spike<sup>2,3</sup> **a.** CV3-25 or **b.** ACE2-Fc fusion protein binding to the spike protein in A549 cells after transduction with 2000 infectious units/cell Ad26.COVS.S.529 (blue line) or Ad26.COVS.S (black line). Binding affinity (Kd) values are shown, each point represents the mean value of a duplicate measurement.

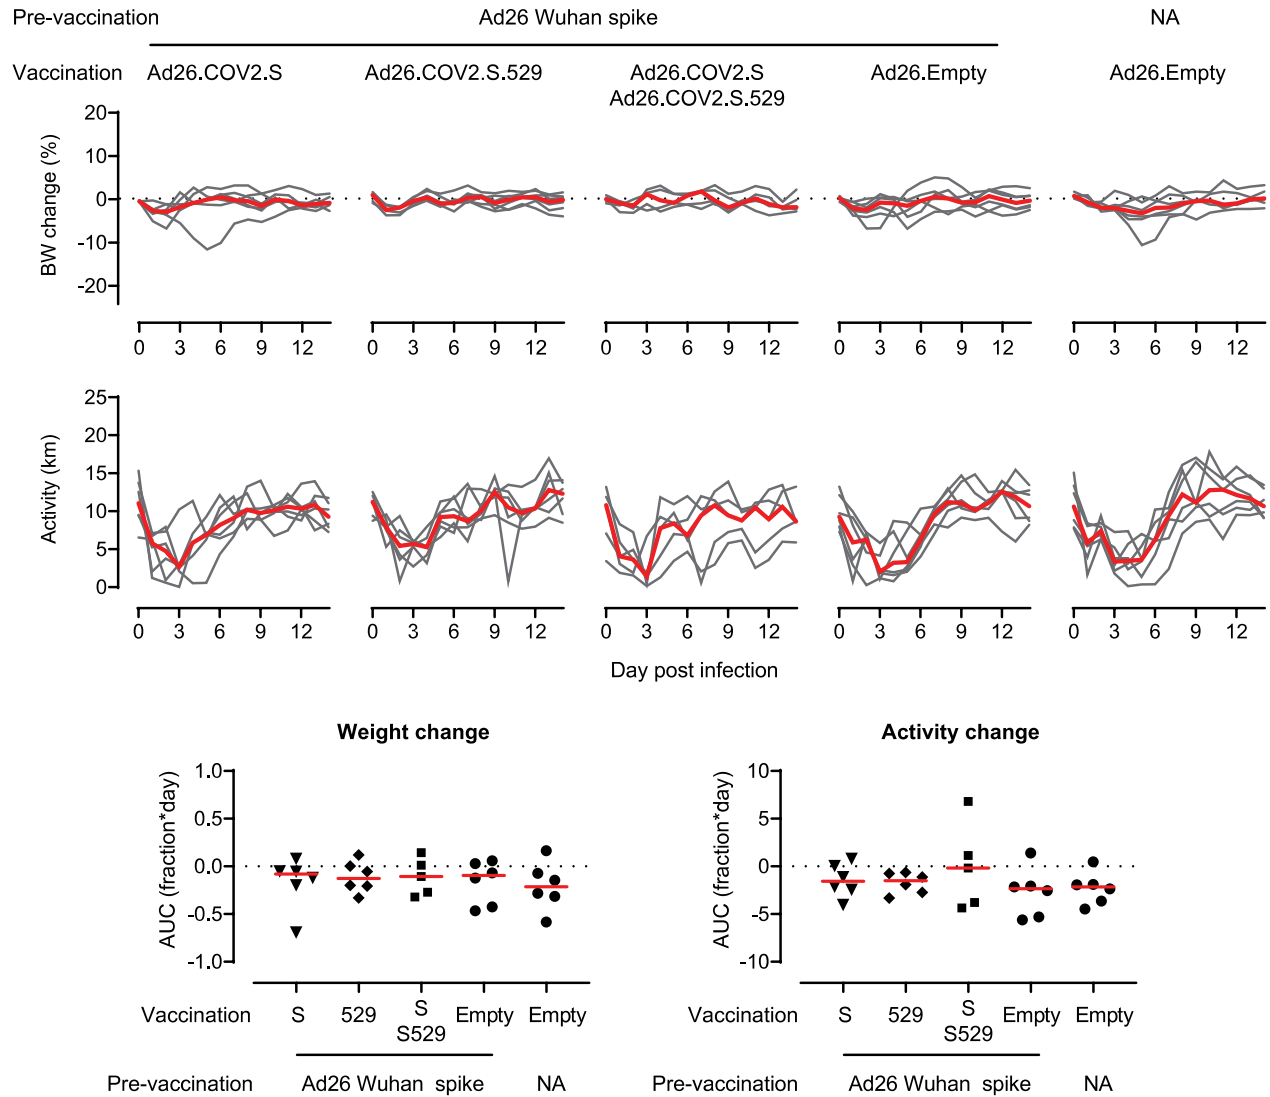

**Supplemental figure 5. Weight and activity change after Omicron BA.2 challenge in hamsters.** Hamsters with pre-existing immunity were generated by pre-vaccination with  $10^7$  viral particles (vp) of Ad26NCOV006 (Ad26 vector encoding Wuhan-Hu-1 spike, pre-immune animals) at week -27. Naïve control hamsters were not vaccinated (NA). At week -4, Ad26 Wuhan-Hu-1 spike-vaccinated hamsters were vaccinated with  $10^9$  vp Ad26.COVID2.S (S), Ad26.COVID2.S.529 (529), a 1:1 combination of S and 529 or Ad26.Empty (all  $n=5-6$ ). In addition, naïve hamsters were vaccinated with Ad26.Empty ( $n=6$ ). The animals were intranasally challenged with  $10^{4.7}$  TCID<sub>50</sub> SARS-CoV-2 BA.2 in week 0. Individual weight and activity traces and the area under the curve (AUC) as a fraction compared with the pre-challenge weight/ activity are shown. Red lines indicate group medians. Comparisons to the pre-vaccinated-only and pairwise comparisons were performed by a t-test with a 3-fold Bonferroni correction. No significant differences were found.

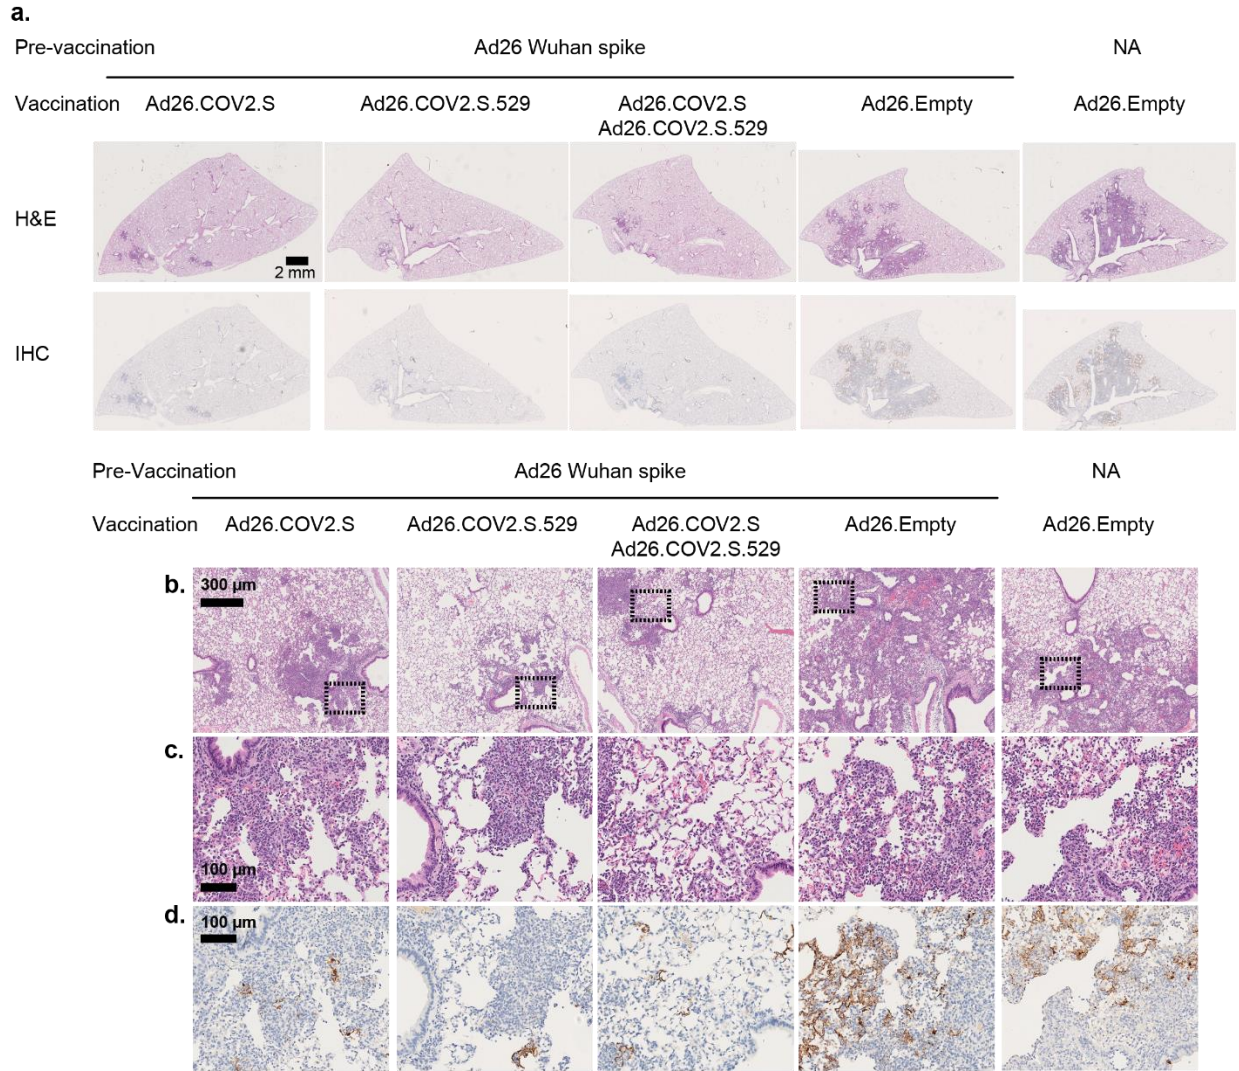

**Supplemental figure 6. Representative histopathology images after Omicron BA.2 challenge.** Hamsters with pre-existing immunity were generated by pre-vaccination with  $10^7$  viral particles (vp) of Ad26NCOV006 (Ad26 vector encoding Wuhan-Hu-1 spike, pre-immune animals) at week -27. Naïve control hamsters were not vaccinated (NA). At week -4, Ad26 Wuhan-Hu-1 spike-vaccinated hamsters were vaccinated with  $10^9$  vp Ad26.COVS.S (S), Ad26.COVS.S.529 (529), a 1:1 combination of S and 529 or Ad26.Empty (all  $n=8$ ). In addition, naïve hamsters were vaccinated with Ad26.Empty ( $n=8$ ). The animals were intranasally challenged with  $10^{4.7}$  TCID<sub>50</sub> SARS-CoV-2 BA.2 on week 0. **a.** Representative overview of H&E-stained left lung lobes, and SARS-CoV-2 nucleocapsid positivity visualized using immunohistochemistry (IHC, brown staining). **b.** Representative H&E-stained lung images are shown per group at a 4x magnification. **c.** A 20x magnification of the H&E staining in the rectangular box is shown. **d.** SARS-CoV-2 nucleocapsid positivity shown for the rectangular box in **b** at a 20x magnification.

### Supplemental references

1. Jennewein, M. F. *et al.* Isolation and characterization of cross-neutralizing coronavirus antibodies from COVID-19+ subjects. *Cell Rep.* **36**, 109353 (2021).
2. Han, P. *et al.* Receptor binding and complex structures of human ACE2 to spike RBD from omicron and delta SARS-CoV-2. *Cell* **185**, 630-640.e10 (2022).
3. Mannar, D. *et al.* SARS-CoV-2 Omicron variant: Antibody evasion and cryo-EM structure of spike protein–ACE2 complex. *Science* **375**, 760–764 (2022).
